# Supplementary material
Source: publisher site journal article supplement (https://www.dovepress.com/article/286313)
Supplement: Supplementary file 1 [file get_supplementary_file.php]

**Appendix A**

Table 1 – Questionnaire items

| **Questions** |
| --- |
| 1. I doubt that my doctor really cares about me as a person. |
| 1. My doctor is usually considerate of my needs and puts them first. |
| 1. I trust my doctor so much that I always try to follow his/her advice. |
| 1. If my doctor tells me something is so, then it must be true. |
| 1. I sometimes distrust my doctor’s opinion and would like a second one. |
| 1. I trust my doctor’s judgments about my medical care. |
| 1. I feel my doctor does not do everything he/she should about my medical care. |
| 1. I trust my doctor to put my medical needs above all other considerations when treating my medical problems. |
| 1. My doctor is well qualified to manage (diagnose and treat or make an appropriate referral) medical problems like mine. |
| 1. I trust my doctor to tell me if a mistake was made about my treatment. |
| 1. I sometimes worry that my doctor may not keep the information we discuss totally private. |
